# Supplementary material for: Approximating Attractors of Boolean Networks by Iterative CTL Model Checking
Source: PubMed Central journal article supplement (PMC4562258; doi:10.3389/fbioe.2015.00130), 2015-09-08
Supplement: data_sheet_1.pdf [file data_sheet_1.pdf]

# Supplementary material for

## ”Approximating attractors of Boolean networks by iterative CTL model checking”

H. Klarner and H. Siebert  
 FB Mathematik und Informatik, Freie Universität Berlin  
 Arnimallee 6, 14195 Berlin, Germany

July 2015

### 1 Proofs for the propositions

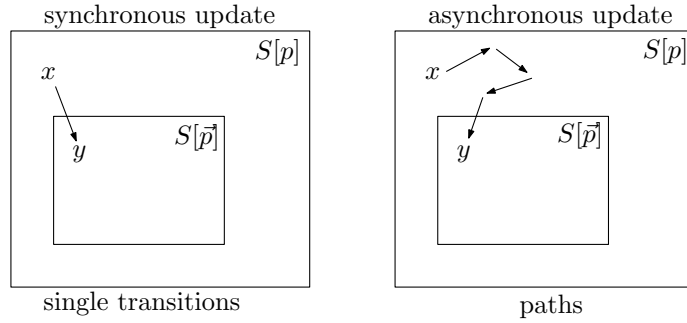

Figure 1: Since there every  $x \in S[p]$  there is  $y \in S[\vec{p}]$  such that there is a path from  $x$  to  $y$  there can not be an attractor that intersect  $S[p] \setminus S[\vec{p}]$ .

**Proposition 1** (Fig. 1). *If  $p$  is a trap space and  $A \subseteq S[p]$  an attractor of  $(S, \rightarrow)$  then  $A \subseteq S[\vec{p}]$ .*

*Proof.* The percolation  $\vec{p}$  of a trap space  $p$  is defined by iterative substitution (see Sec. 3.1 in main text), i.e., by a sequence of trap spaces

$$p = p_0, p_1, p_2 \dots, p_K = \vec{p}$$

where each pair  $p_k, p_{k+1}$  is a single percolation step and  $K$  the first index that satisfies  $p_K = p_{K+1}$ . Witout loss of generality we can assume that  $K = 1$  because the statement is trivially true for  $K = 0$  and will follow for  $K > 1$  by induction. Hence, let  $p$  be a trap space whose percolation is achieved by a single step.

**Synchronous update:** Any state in the subspace  $p$  will reach the subspace  $\vec{p}$  by a single transition because  $f_v(x) = \vec{p}(v)$  holds for any  $v$  in the domain of

$\vec{p}$  (by definition of  $\vec{p}$ ). Since  $\vec{p}$  is a trap space this implies that there can not be a SCC in between  $p$  and  $\vec{p}$ , i.e., intersecting  $S[p] \setminus S[\vec{p}]$ .

**Asynchronous update:** For any state  $x$  in the subspace  $p$  and any variable  $v$  that is fixed in  $\vec{p}$  there is a transition to some state  $y$  such that  $\vec{p}(v) = y(v)$ . Since this argument can be repeated for  $y$  there is a path from  $x$  to the subspace  $\vec{p}$  (of at most  $|D_{\vec{p}} \setminus D_p|$  transitions). As before, since  $\vec{p}$  is a trap space there can be no attractor in between  $p$  and  $\vec{p}$ .  $\square$

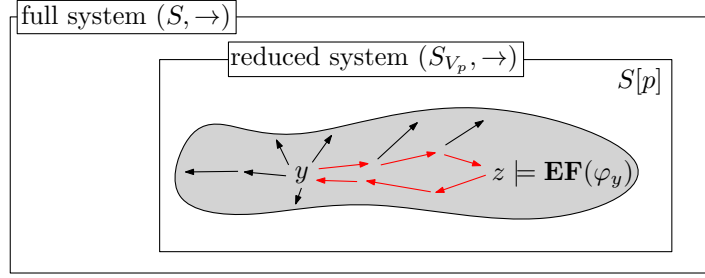

Figure 2: Iff all states  $z$  that are reachable from  $y$  satisfy  $\mathbf{EF}(\varphi_y)$  then  $y$  belongs to an attractor  $A \subseteq S[p]$ .

**Proposition 2** (Attractor State, Fig. 2). *Let  $p$  be a trap space and  $x \in S[p]$ . The state  $x$  belongs to an attractor  $A \subseteq S[p]$  of  $(S, \rightarrow)$  iff*

$$TS = (S_{V_p}, \rightarrow, \{y\}) \models \mathbf{AG}(\mathbf{EF}(\varphi_y))$$

where  $y \in S_{V_p}$  is the projection of  $x \in S_V$  onto  $V_p$ , i.e.,  $y(v) := x(v)$  for all  $v \in V_p$ .

*Proof.* Let  $p$  be a trap space and  $x \in S[p]$  with  $x \in A$  for some attractor  $A \subseteq [p]$ . Since  $A$  is an attractor it is an inclusion-wise minimal trap set (by definition) and must therefore be strongly connected because otherwise it would contain a smaller trap set. Hence any state in  $A$ , and therefore any state reachable from  $x$ , has a path back to  $x$ . With respect to the reduced system  $(S_{V_p}, \rightarrow)$  this means that any state  $z \in S_{V_p}$  that is reachable from the projection  $y$  satisfies  $\mathbf{EF}(\varphi_y)$ . Since the states reachable from  $y$  are referenced by  $\mathbf{AG}$  it follows that  $\mathbf{AG}(\mathbf{EF}(\varphi_y))$  is true for  $y$ . So the transition system  $(S_{V_p}, \leftrightarrow)$  with initial states  $\{y\}$  satisfies  $\models \mathbf{AG}(\mathbf{EF}(\varphi_y))$ .

Let  $p$  be a trap space such that  $TS = (S_{V_p}, \leftrightarrow, \{y\}) \models \mathbf{AG}(\mathbf{EF}(\varphi_y))$  where  $y \in S_{V_p}$  is the projection of some state  $x \in S_V$  onto  $V_p$ . Then all states reachable from  $y$  ( $\mathbf{AG}$ ) have a path back to  $y$  ( $\mathbf{EF}(\varphi_y)$ ) and hence  $y$  belongs to a strongly connected component  $A'$  (all states of  $A'$  are connected via  $y$ ).  $A'$  must also be a trap set because the connectedness holds for every state reachable from  $y$ . Hence  $A'$  is an attractor. Note that  $A' \subseteq S_{V_p}$  so far, but given  $p$  we can position  $A'$  in  $S_V$ , call it  $A$ , by assigning values to the variables  $D_p$  according to  $p$  such that  $A \subseteq S_V$  is an attractor of  $(S, \rightarrow)$  and  $x \in A$ .  $\square$

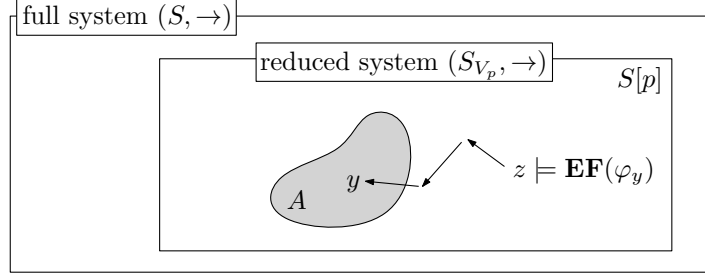

Figure 3: Iff for every state  $z \in S_{V_p}$  there is a path to  $y$  then  $A$  is the unique attractor of  $S[p]$ .

**Proposition 3** (Univocality, Fig. 3). *Let  $p$  be a trap space and  $x \in A$  such that  $A \subseteq S[p]$  is an attractor of  $(S, \rightarrow)$ .  $p$  is univocal in  $(S, \rightarrow)$  iff*

$$TS = (S_{V_p}, \rightarrow, S_{V_p}) \models \mathbf{EF}(\varphi_y)$$

where  $y \in S_{V_p}$  is the projection of  $x \in S_V$  onto  $V_p$ .

*Proof.* If  $p$  is univocal in  $(S, \rightarrow)$  then  $A$  is the only attractor of  $(S, \rightarrow)$  and  $x \in A$  can be reached from every state in  $S_{V_p}$ . Hence the transition system  $(S_{V_p}, \rightarrow)$  with initial states  $S_{V_p}$  satisfies  $\mathbf{EF}(\varphi_y)$ .

If the transition system  $TS = (S_{V_p}, \rightarrow, S_{V_p})$  satisfies  $\mathbf{EF}(\varphi_y)$  then  $y$  belongs to the unique attractor  $A' \subseteq S_{V_p}$  of  $(S_{V_p}, \rightarrow)$ . As in the previous proof we can use  $p$  to position  $A'$  in the original transition system  $(S, \rightarrow)$  and this set  $A$  will be the unique attractor  $A \subseteq S[p]$  and  $x \in A$  holds.  $\square$

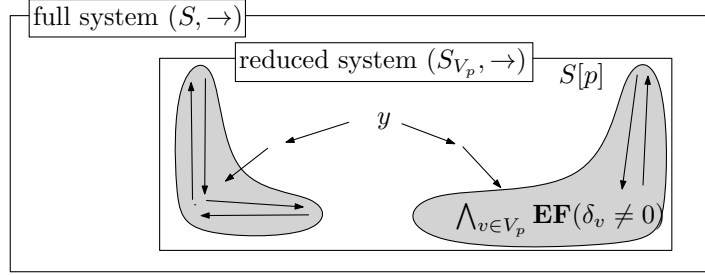

Figure 4: The attractors of a trap space  $p$  are faithful iff for every  $y \in S_{V_p}$  and  $v \in V_p$  there is a path to a state  $z$  that satisfies  $z \models \delta_v \neq 0$ .

**Proposition 4** (Faithfulness, Fig. 4). *A trap space  $p$  is faithful in  $(S, \rightarrow)$  iff*

$$TS = (S_{V_p}, \rightarrow, S_{V_p}) \models \bigwedge_{v \in V_p} \mathbf{EF}(\delta_v \neq 0).$$

*Proof.* Let  $p$  be faithful and  $x \in S_{V_p}$  arbitrary. We want to prove that

$$x \models \bigwedge_{v \in V_p} \mathbf{EF}(\delta_v \neq 0). \quad (1)$$

Since  $p$  is faithful, every attractor  $A \subseteq S[p]$  satisfies  $\text{Sub}(A) = p$ . Let  $A$  be an attractor of  $S[p]$  that is reachable from  $x$ . Since  $\text{Sub}(A) = p$  there are  $x_1, x_2 \in A$  such that  $x_1(v) \neq x_2(v)$  for every  $v \in V_p$ . Since  $x_1, x_2$  belong to  $A$  there is a path between  $x_1$  and  $x_2$  and hence a transition in which the activity of  $v \in V_p$  changes. Let  $x'_1 \rightarrow x'_2$  be such that  $x'_1(v) \neq x'_2(v)$ . Hence  $\delta_v(x'_1) \neq 0$ . Since  $A$  is reachable from  $x$  and  $x'_1$  from  $x$  it follows that  $x \models \mathbf{EF}(\delta_v \neq 0)$ . Since  $v \in V_p$  was chosen arbitrarily, Eq. 1 holds.

For the other direction let the transition system  $(S_{V_p}, \rightarrow)$  with initial states  $S_{V_p}$  be such that Eq. 1 holds for every  $x \in S_{V_p}$ . The equation therefore holds in particular for every  $x \in A$  where  $A$  is an attractor of  $S[p]$ . Hence, for every  $v \in V_p$  and attractor  $A$  there is  $y \in A$  such that  $\delta_v(y) \neq 0$  and hence a transition  $y \rightarrow y'$  such that  $y(v) \neq y'(v)$ . Hence  $\text{Sub}(A) = p$  and so  $p$  is faithful.  $\square$

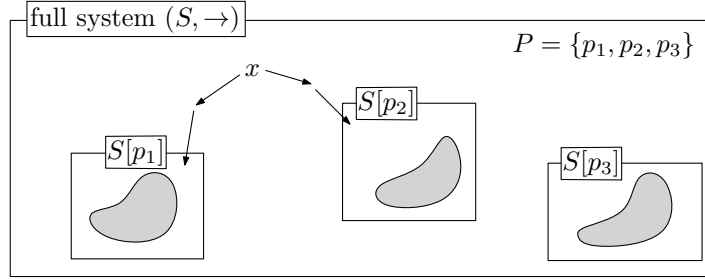

Figure 5: The trap spaces  $P := \{p_1, p_2, p_3\}$  are complete iff for every initial state  $x$  there is a path to some trap space  $p \in P$ .

**Proposition 5** (Completeness, Fig. 5). *A set of trap spaces  $P$  is complete in  $(S, \rightarrow)$  iff*

$$TS = (S, \rightarrow, S) \models \bigvee_{p \in P} \mathbf{EF}(\varphi_p).$$

*Proof.* Let  $P$  be a complete set of trap spaces of  $(S, \rightarrow)$  and  $x \in S$  arbitrary. We want to show that

$$x \models \bigvee_{p \in P} \mathbf{EF}(\varphi_p). \quad (2)$$

Let  $A$  be an arbitrary attractor that is reachable from  $x$ . Since  $P$  is complete there is  $p \in P$  such that  $A \subseteq S[p]$ . Since there is a path from  $x$  to  $A$  it follows that  $x \models \mathbf{EF}(\varphi_p)$  and therefore Eq. 2 holds.

For the other direction note that if Eq. 2 holds for all  $x \in S$  that it holds in particular for all states of every attractor. But if for every attractor  $A$  there is a  $p \in P$  such that there is a path from  $A$  to  $S[p]$  then  $A \subseteq S[p]$  and  $P$  is complete.  $\square$

**Proposition 6** (Refinement of Complete Sets, Fig. 6). *Let  $P \subseteq S_F^*$  be complete in  $(S, \rightarrow)$  and  $p \in P$  some trap space. If  $Q \subseteq S_{F_p}^*$  is complete in  $(S_{V_p}, \rightarrow)$  then  $P' := (P \setminus \{p\}) \cup \{q \sqcap p \mid q \in Q\}$  is complete in  $(S, \rightarrow)$ .*

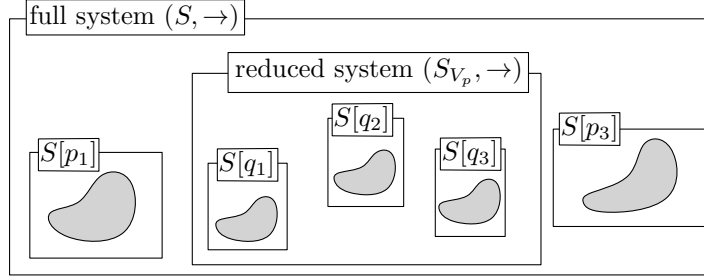

Figure 6: Refinement works by replacing a trap space  $p$  by some set of trap spaces that is complete in  $S_{V_p}$ .

*Proof.* Let  $P$  be a complete set of trap spaces of  $(S, \rightarrow)$  and  $p \in P$  arbitrary. Consider the reduced system  $(F_p, V_p)$  and its trap spaces  $S_{F_p}^*$  and let  $Q \subseteq S_{F_p}^*$  be complete in  $(S_{V_p}, \rightarrow)$ . Note that we defined subspaces as mappings  $p : D_p \rightarrow \mathbb{B}$ . Hence, although a trap space  $q$  of  $(V_p, F_p)$  is well-defined when considered as a subspace of  $(V, F)$ , we need to intersect it with  $p$  to assign values to the variables that are implicitly fixed in  $q$  when considered as a subspace of  $(V_p, F_p)$ . The completeness of  $P'$  then follows from the completeness of  $Q$  in  $(S_{V_p}, \rightarrow)$  because the dynamics inside  $p$  is identical with the dynamics of the reduced system  $(V_p, F_p)$ .  $\square$

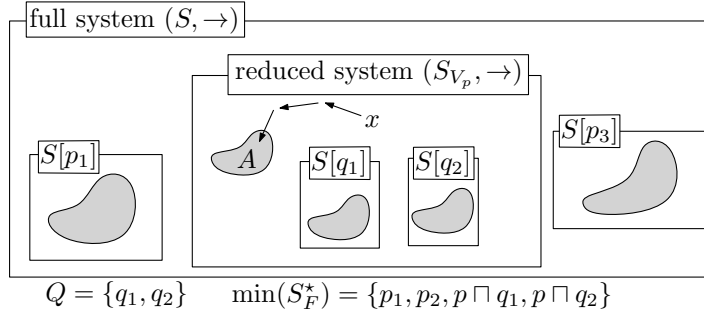

Figure 7: .

**Proposition 7** (Failure Criterion, Fig. 7). *If there is a trap space  $p$  such that  $\min(S_{F_p}^*)$  is not complete in  $(S_{V_p}, \rightarrow)$  then  $\min(S_F^*)$  is not complete in  $(S, \rightarrow)$ .*

*Proof.* Suppose  $p$  is such that  $Q := \min(S_{F_p}^*)$  is not complete in  $(S_{V_p}, \rightarrow)$ . The main observation is that  $P := \{p \sqcap q \mid q \in \min(S_{F_p}^*)\} \subseteq \min(S_F^*)$ . That is, if the subspace  $Q$  are positioned correctly within  $(S, \rightarrow)$ , i.e., intersected with  $p$ , then they are also minimal trap spaces of  $(V_p, F_p)$ . The statement then follows because if  $Q$  is not complete in  $(S_{V_p}, \rightarrow)$  then there is a state  $x \in S[p]$  that can

not reach any trap space in  $P$ . But, since  $p$  is a trap space  $x$  must reach some attractor  $A$  which is therefore outside of  $P$  and hence outside of  $\min(S_F^*)$  which implies that  $\min(S_F^*)$  is not complete in  $(S, \rightarrow)$ .  $\square$

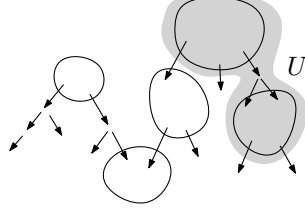

Figure 8: A schematic drawing of the interaction graph, enclosed are SCCs, and an autonomous set  $U$ .

**Proposition 8** (Fig. 8). *Let  $U$  be autonomous and  $Q := \min(S_{F|_U}^*)$  the minimal trap spaces of the restriction  $(U, F|_U)$ .*

- (a) *If  $Q$  is complete in  $(S_U, \rightarrow)$  then  $Q$  is also complete in  $(S, \rightarrow)$ .*
- (b) *If  $Q$  is not complete in  $(S_U, \rightarrow)$  then  $\min(S_F^*)$  is not complete in  $(S, \rightarrow)$ .*

*Proof. Observations:* The dynamics in the restricted and full transition systems can be related to each other. For any path  $(y_0, y_1, \dots, y_k)$  of  $(S_U, \rightarrow)$  and any  $x_0 \in S[y_0]$  there is a path  $(x_0, x_1, \dots, x_k)$  of  $(S, \rightarrow)$  such that  $x_i(u) = y_i(u)$  for all  $u \in U$  and  $1 \leq i \leq k$ . Also, for any path  $(x_0, x_1, \dots, x_k)$  of  $(S, \rightarrow)$  there is a unique path  $(y_0, y_1, \dots, y_r)$  in  $(S_U, \rightarrow)$  with  $r \leq k$ ,  $x_0 \in S[y_0]$  and  $x_k \in S[y_r]$  that describes the projected dynamics. It follows that a trap space  $q$  of  $(U, F|_U)$  is also a trap space of  $(V, F)$  because otherwise we could consider the projection of the path that proves that  $q$  is not a trap space in  $(V, F)$  and deduce that  $q$  is not a trap space in  $(U, F|_U)$ , a contradiction. Hence  $Q$  is a set of trap spaces of  $(V, F)$ .

**Proof of (a):** Let  $Q$  be complete in  $(S_U, \rightarrow)$  and  $x \in S$  an arbitrary state. We want to show that there is a path from  $x$  to some  $q \in Q$ . Let  $y$  be the projection of  $x$  onto  $U$ . Since  $Q$  is complete there is a path  $(y_0, y_1, \dots, y_k)$  such that  $y_0 = y$  and  $y_k \in S[q]$  for some  $q \in Q$ . By the observations above there is therefore a path  $(x_0, x_1, \dots, x_k)$  with  $x_0 = x$  and  $x_k \in S[q]$ . Hence  $Q$  is complete in  $(S, \rightarrow)$ .

**Proof of (b):** The main observation is that since  $U$  is autonomous and since  $Q = \min(S_{F|_U}^*)$  it follows that for any  $p \in \min(S_F^*)$  there is  $q \in Q$  such that  $p \leq q$ . If  $Q$  is not complete in  $(S_U, \rightarrow)$  then there is  $y \in S_U$  that can not reach any  $q \in Q$ . Any  $x$  whose projection on  $U$  is equal to  $y$  can therefore not reach any  $q \in Q$  in  $(S, \rightarrow)$ . Hence it can not reach any  $p \in \min(S_F^*)$  (because for any  $p$  there is a  $q \in Q$  with  $q \leq p$ ). Hence  $\min(S_F^*)$  is not complete in  $(S, \rightarrow)$ .  $\square$

**Proposition 9** (Fig. 8). *Let  $U \subseteq V$ . The following statements are equivalent:*

- (a)  *$U$  is a minimal autonomous set of  $(V, \rightarrow)$ .*
- (b)  *$U$  is autonomous and  $U \in SCCs(V, \rightarrow)$ .*

*Proof. (a)  $\Rightarrow$  (b):* Let  $U$  be minimal and autonomous in  $(V, \rightarrow)$ . We need to show that  $U$  is strongly connected. Let  $u, v \in U$  be arbitrary. If there is no path from  $u$  to  $v$  then  $u$  is not above  $v$  and so  $Above(v)$  is a proper autonomous subset  $U$ , a contradiction to minimality. Hence, there is a path from  $u$  to  $v$  and so  $U$  is strongly connected.

*(b)  $\Rightarrow$  (a):* Let  $U$  be autonomous and strongly connected. We need to show that  $U$  does not contain a smaller autonomous set. Assume there is  $U' \subset U$  with  $U' \neq U$  and  $U'$  is autonomous. Let  $u \in U \setminus U'$ . Since  $U$  is strongly connected there is a path from  $u$  to any  $u' \in U'$ . Hence  $u$  is above  $u'$  and so  $u \in U'$  which contradicts  $u \in U \setminus U'$ . Hence such  $U'$  does not exist and  $U$  is minimal.  $\square$

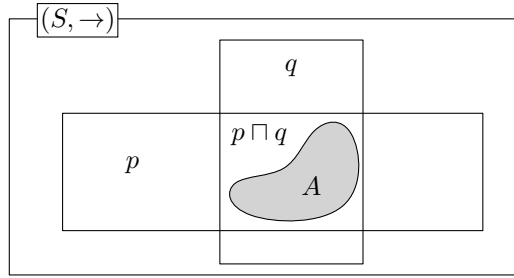

Figure 9: For every attractor  $A$  there are  $p \in P$  and  $q \in Q$  such that  $A \subseteq S[p]$  and  $A \subseteq S[q]$ . Hence  $p$  and  $q$  are consistent and  $A \subseteq S[p \sqcap q]$ .

**Proposition 10** (Fig. 9). *If  $P, Q \subseteq S_F^*$  are complete in  $(S, \rightarrow)$  then  $P \sqcap Q := \{p \sqcap q \mid p \in P, q \in Q : p \text{ and } q \text{ are consistent}\}$  is also complete in  $(S, \rightarrow)$ .*

*Proof.* Let  $A$  be an attractor of  $(S, \rightarrow)$ . Since  $P$  and  $Q$  are complete there are  $p \in P$  and  $q \in Q$  such that  $A \subseteq S[p]$  and  $A \subseteq S[q]$ . Hence,  $p$  and  $q$  are consistent and  $(p \sqcap q) \in P \sqcap Q$ . Hence  $P \sqcap Q$  is complete in  $(S, \rightarrow)$ .  $\square$

**Proposition 11.** *Let  $(Z, \triangleright)$  be the condensation graph of a constant-free network  $(V, F)$ . A set  $U \subseteq V$  is minimal and autonomous iff  $U \in Z$  and  $Lay(U) = 1$ .*

*Proof.* Let  $U$  be minimal and autonomous. It follows from Prop. 9 that  $U \in SCCs(V, \rightarrow)$ . We need to show that  $Lay(U) = 1$ . If  $Lay(U) > 1$  then  $Above(U) \supseteq U$  with  $Above(U) \neq U$  which contradicts  $U$  being autonomous.

For the other direction assume that  $U \in Z$  and  $Lay(U) = 1$ . We will again use Prop. 9. Note that  $Z = SCCs(V, \rightarrow)$ . Also,  $U$  is autonomous because if  $Above(U) \supset U$  with  $U \neq Above(U)$  then  $Lay(U) > 1$ , i.e., there would have to be an SCC above  $U$ . Note that the last deduction uses the fact that  $(V, F)$  is constant-free.  $\square$

## 2 Update Functions

The update functions for the three Boolean networks are given in Fig. 10.

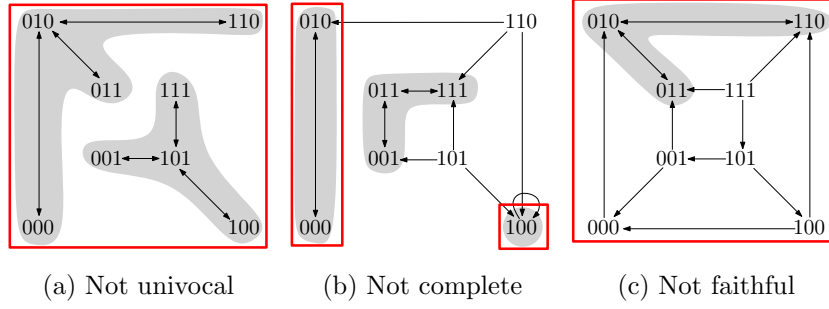

Figure 10: The asynchronous STGs of the three Boolean networks given in Fig. 1 of the main text.

$$\begin{aligned}
 f_1 &:= \bar{v}_1 \bar{v}_2 v_3 + \bar{v}_1 v_2 \bar{v}_3 + v_1 \bar{v}_2 \bar{v}_3 + v_1 v_2 v_3 \\
 f_2 &:= \bar{v}_1 \bar{v}_2 \bar{v}_3 + \bar{v}_1 v_2 v_3 + v_1 \bar{v}_2 v_3 + v_1 v_2 \bar{v}_3 \\
 f_3 &:= \bar{v}_1 \bar{v}_2 v_3 + \bar{v}_1 v_2 \bar{v}_3 + v_1 \bar{v}_2 \bar{v}_3 + v_1 v_2 v_3
 \end{aligned} \tag{a}$$

$$\begin{aligned}
 f_1 &:= \bar{v}_1 v_2 v_3 + v_1 \bar{v}_2 \bar{v}_3 \\
 f_2 &:= \bar{v}_1 \bar{v}_2 + v_1 v_3 \\
 f_3 &:= \bar{v}_1 v_3 + v_1 v_2
 \end{aligned} \tag{b}$$

$$\begin{aligned}
 f_1 &:= \bar{v}_1 v_2 \bar{v}_3 \\
 f_2 &:= \bar{v}_1 + \bar{v}_3 \\
 f_3 &:= \bar{v}_1 v_2 \bar{v}_3
 \end{aligned} \tag{c}$$
